# Supplementary material
Source: PubMed Central journal article supplement (PMC6140517)
Supplement: pnas.1806260115.sapp.pdf [file pnas.1806260115.sapp.pdf]

# Supplementary Appendix

## Contents

|                                                              |    |
|--------------------------------------------------------------|----|
| 1. Measures and Domains in the Aging Society Index .....     | 2  |
| 2. Goalpost method.....                                      | 5  |
| 3. Z-scores method .....                                     | 7  |
| 4. Lowest domain method.....                                 | 8  |
| 5. Robustness checks .....                                   | 8  |
| 6. Programs:.....                                            | 14 |
| agingindex.R .....                                           | 14 |
| calculate.R .....                                            | 17 |
| goalpost.R.....                                              | 18 |
| zscore.R.....                                                | 19 |
| 7. References .....                                          | 20 |
| 8. Group Authors: Research Network on an Aging Society ..... | 21 |

## 1. Measures and Domains in the Aging Society Index

When assessing the aging of societies and their capacity to support older populations, we sought to develop an evidence-based metric to assess the status of older populations across countries, and within countries across a series of economic and social domains in order to compare countries' success in adapting to population aging. The metric would serve both as a guide to inform policies for forging a productive and equitable aging society and as a tool to assess their effectiveness over time.

The Research Network on an Aging Society, a fourteen-member interdisciplinary group of geriatricians, demographers, sociologists, economists, psychologists, and policy experts, working from the framework of the well-established Successful Aging paradigm (1). We formulated an evidence-based model of a successfully aging society. We defined with the following five major components for the successful aging of a society:

- ❖ **PRODUCTIVITY AND ENGAGEMENT** – a successfully aging society facilitates the engagement of older persons in society, either through work for pay or volunteering (2-7);
- ❖ **WELL-BEING** - a successfully aging society provides health care informed by a sophisticated understanding of the health care needs of older persons (8, 9);
- ❖ **EQUITY**- a successfully aging society distributes resources equitably across the older population thus lessening the gap between the 'haves' and the 'have nots' (10, 11);
- ❖ **COHESION** – a successfully aging society maintains social connectedness and solidarity, within and between generations (12-14) and
- ❖ **SECURITY**- a successfully aging society provides economic and physical security for older persons (15).

The Index has five major domains, each corresponding to one of our five central components of a successfully aging society. The data for each domain includes between two and five specific measures available for all OECD countries we studied. The Aging Society Network determined the measures and relative weights within each domain, and a weight for each of the five domains within the overall Index (Fig. 1). Details of each measure is reported in Table 1.

**Fig. 1.** Measures in the Aging Society Index

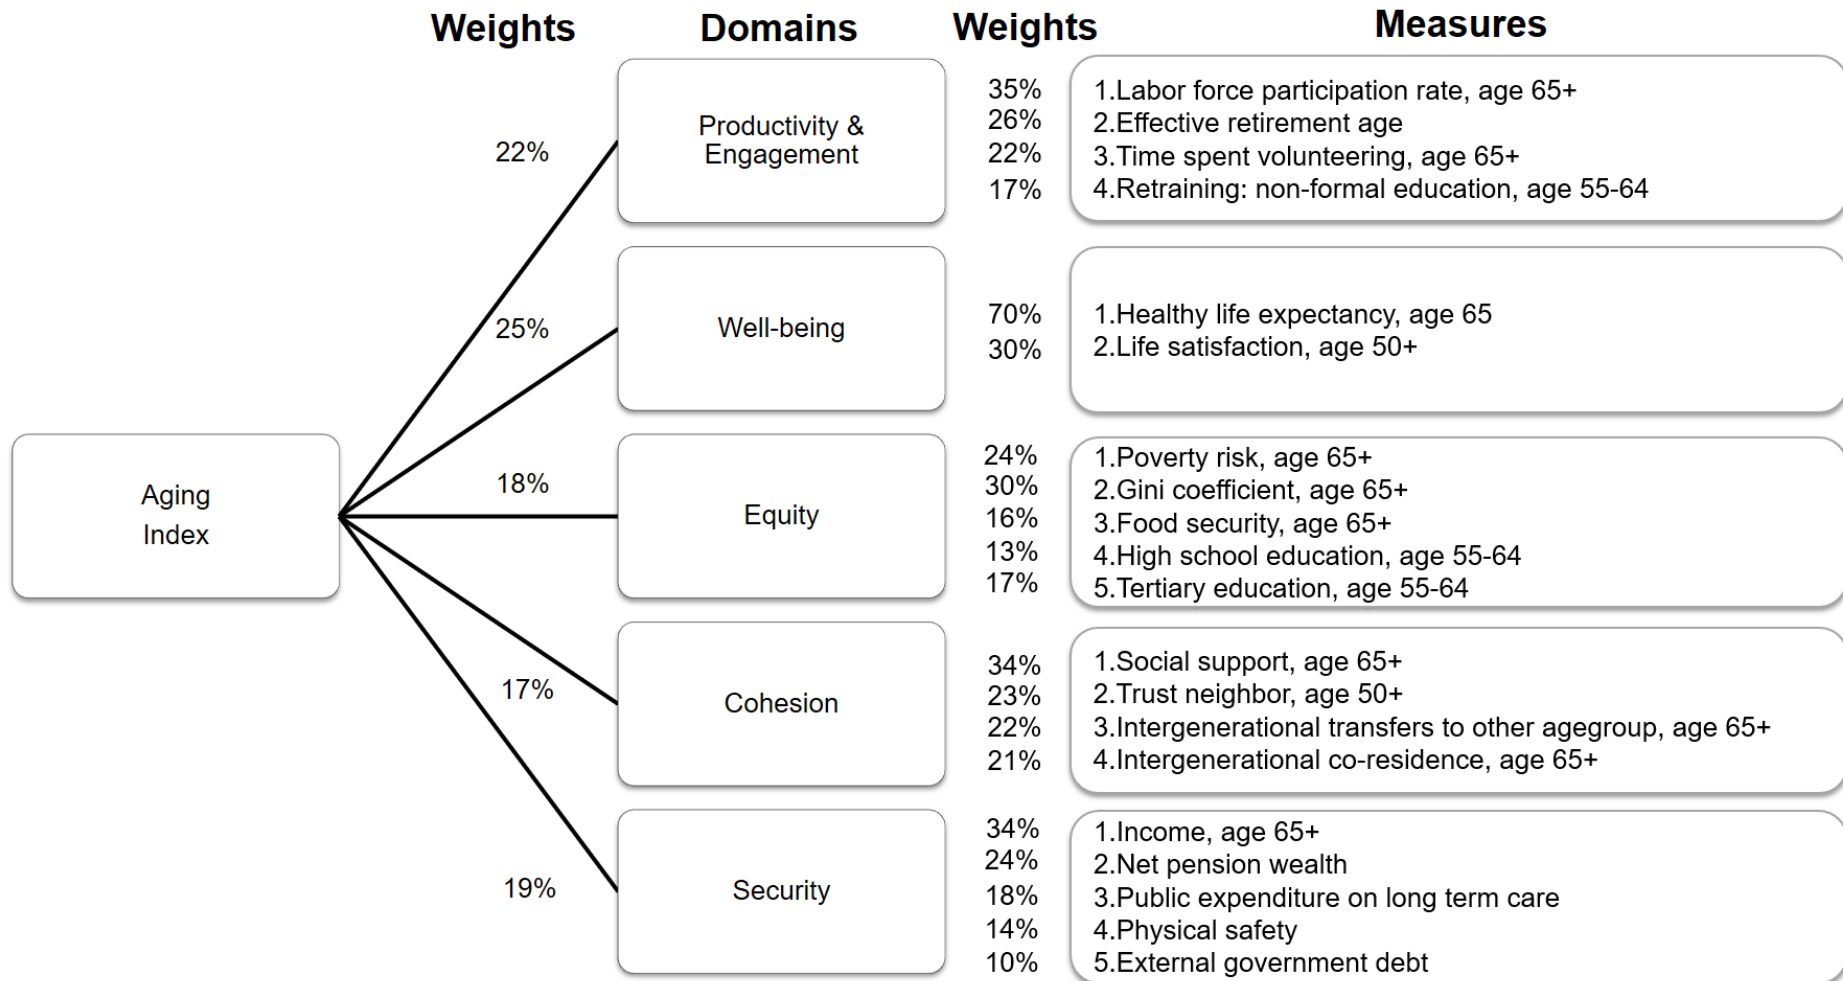

**Table 1.** Measures and data sources

|                                                                                                                                                                                                              |
|--------------------------------------------------------------------------------------------------------------------------------------------------------------------------------------------------------------|
| <b>PRODUCTIVITY AND ENGAGEMENT</b>                                                                                                                                                                           |
| <b>Labor force participation rate for people aged 65+</b><br>The proportion of population age 65+ in the labor force, OECD                                                                                   |
| <b>Effective retirement age</b><br>The effective age at which older workers withdraw from the labor force, OECD                                                                                              |
| <b>Time spent volunteering for people aged 65+</b><br>Average minutes of volunteering per day, OECD                                                                                                          |
| <b>Retraining: Non-formal education for people aged 55 to 64</b><br>Proportion of the population aged 55-64 that participated in non-formal education, OECD                                                  |
| <b>WELL-BEING</b>                                                                                                                                                                                            |
| <b>Objective well-being: Healthy life expectancy at aged 65</b><br>Average number of years that a person aged 65 is expected to live in a state of good health, OECD                                         |
| <b>Subjective well-being for people aged 50 and above: life satisfaction</b><br>“All things considered, how satisfied would you say you are with your life these days?”<br>(Gallup)                          |
| <b>EQUITY</b>                                                                                                                                                                                                |
| <b>Gini coefficient for people aged 65 and older</b><br>Degree of inequality of income distribution within a country, OECD                                                                                   |
| <b>Poverty risk for people aged 65 and older</b><br>Ratio of people whose income falls below the poverty line, taken as half the median household income of the total population, OECD.                      |
| <b>Food security for people aged 65 and older</b><br>Europe: the share of people living in households who cannot afford to eat a meal with meat, fish or protein equivalent every second day, Eurostat.      |
| <b>USA: households in which one or more people were hungry at times during the year because they could not afford enough food, USDA.</b><br>Attained at least high school education for people aged 55 to 64 |
| <b>Proportion of the population aged 55-64 that has attained high school or higher education</b><br>Attained at least tertiary education for people aged 55 to 64                                            |
| <b>COHESION</b>                                                                                                                                                                                              |
| <b>Trust neighbor for people aged 50 and older</b><br>People aged 50 who responded that they trust their neighbor, World Value Survey                                                                        |
| <b>Social support for people aged 65 and older</b><br>People who report having relatives or friends they can count on, OECD                                                                                  |
| <b>Intergenerational transfers to other age group, aged 65+</b><br>Percentage of transfers elderly provides to other age group, National Transfers Account                                                   |
| <b>Intergenerational co-residence for people aged 65+</b><br>Percentage of elderly staying with children, Countries' Census                                                                                  |

| <b>SECURITY</b>                                                                                                                                                                                                          |
|--------------------------------------------------------------------------------------------------------------------------------------------------------------------------------------------------------------------------|
| <p><b>Income for people aged 65+</b><br/>The income of older people, comparing them with the population as a whole, OECD.</p>                                                                                            |
| <p><b>Net pension wealth</b><br/>Present value of the flow of pension benefits, taking account of the taxes and social security contributions that retirees have to pay on their pensions, National Transfer Account</p> |
| <p><b>Public expenditure on long term care (%GDP)</b><br/>Long-term care public expenditure (health and social components), as share of GDP, OECD</p>                                                                    |
| <p><b>Physical safety</b><br/>Percentage of the population declaring feeling safe when walking alone at night in the city or area where they live, OECD</p>                                                              |
| <p><b>External government debt (%GDP)</b><br/>Country's external government debt as share of GDP, CIA.</p>                                                                                                               |

## 2. Goalpost method

The specific measures within the domains were chosen by the Network members from the various measures for which data are available from all, or from a meaningful subset, of the OECD countries. The methodology to construct the Aging Society Index using the goalpost method can be divided into four steps below:

First, we convert all measures as positive indicators, where higher values indicate better outcomes in the aging society. For example, “poverty risk in the elderly” was expressed as “the proportion not at risk of poverty”.

Second, each positive indicator is standardized with a score of 0 for the worst performing country in the data set available and a score of 100 as the best performing countries. This is done by assigning a score of 0 to the minimum observed value across countries and a score of 100 to the maximum observed value. Having defined the maximum and minimum values, a specific country’s score can be calculated as follows:

$$Goalpost = \frac{actual - \min}{max - \min} * 100$$

For example, OECD data indicates that incomes of older people are on average lower than the total population. The lowest OECD country was Estonia where those over 65s had an income of 68.9% of the total population (given a score of 0). The

highest income was Spain where elderly had an income of 95.9% income of the total population and given a score of 100. The incomes of the people over 65s in the U.S. had 92.1% income of the total population and given a score of 85.9 for this measure.

$$\text{For example, } goalpost_{USA_{income}} = \frac{92.1-68.9}{95.9-68.9} * 100 = 85.9$$

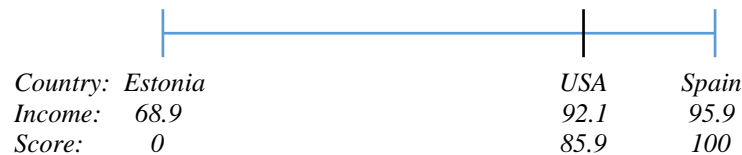

Third, we calculate the domains scores as a weighted summation of the measures in each domain using weights below. The weights within each domains sum to 100%. There were a number of important considerations regarding weighting of the specific measures within a domain and across domains for the final Index.

We employed three weighting strategies. The first was to weigh all measures within a domain equally with all weights summing to 100%. Thus if a specific domain had four measures, each would have a weight of 25%. We also attribute weights to the measures based on the recommendations of the fourteen member Network members. Each Network member was asked to provide individual weights for each measure, and average weights were calculated. The same approach was taken to weighting the five domains included in the final Index (Table 2). The final method was to set the aging index as the minimum over the five domain scores. This weighting scheme will rank high only for countries with no weaknesses in their domain scores.

**Table 2.** Weights assigned to measures in Aging Society Index

| Domains                                         | Measures                                     | Equal weights | Network weights |
|-------------------------------------------------|----------------------------------------------|---------------|-----------------|
| <b>Productivity and Engagement (4 measures)</b> | Labor force participation rate, aged 65+ (%) | 25%           | 35%             |
|                                                 | Effective retirement age                     | 25%           | 26%             |
|                                                 | Volunteering, aged 65+ (mins per day)        | 25%           | 22%             |
|                                                 | Retraining, aged 55-64 (%)                   | 25%           | 17%             |
| <b>Well-being (2 measures)</b>                  | Healthy life expectancy, aged 65             | 50%           | 70%             |
|                                                 | Life satisfaction, aged 50+                  | 50%           | 30%             |
| <b>Equity</b>                                   | Gini, aged 65+ (%)                           | 20%           | 30%             |

|                                  |                                              |     |     |
|----------------------------------|----------------------------------------------|-----|-----|
| <b>(5 measures)</b>              | Food insecurity, 65+ (%)                     | 20% | 16% |
|                                  | Poverty risk, aged 65+ (%)                   | 20% | 24% |
|                                  | Upper sec attainment, aged 5564 (%)          | 20% | 13% |
|                                  | Tertiary attainment, aged 5564 (%)           | 20% | 17% |
| <b>Cohesion<br/>(3 measures)</b> | Social support, aged 50+ (%)                 | 33% | 56% |
|                                  | Intergenerational co-residence, aged 65+ (%) | 33% | 21% |
|                                  | Trust neighbor, aged 50+ (%)                 | 33% | 23% |
| <b>Security<br/>(5 measures)</b> | Income, aged 65+ (%)                         | 20% | 34% |
|                                  | Net pension wealth                           | 20% | 24% |
|                                  | External government debt (%GDP)              | 20% | 10% |
|                                  | Public expenditure on LTC as %GDP            | 20% | 18% |
|                                  | Feel safe walking at night                   | 20% | 14% |

Finally, the overall composite index is calculated as the weighted summation of the five specific domain scores (in step 3). The network weights for domains are 22% for PRODUCTIVITY AND ENGAGEMENT, 25% for WELL-BEING, 18% for EQUITY, 17% for COHESION, and 19% for SECURITY. Equal weights across domains (20% each) were also used as robustness check. We also acknowledged the value of flexibility in weighting and have established an open-access website which will allow individuals to recalculate the index based on their desired weights (16).

It is important to note that maximum scores within each measure and domain are achievable as the best-performing country was used as a benchmark rather than some theoretical value.

### **3. Z-scores method**

We compared the results from the above goalpost method to Z-scores method. This method was used to allow standardization of indicators with different types and scales. It provided a convenient way to normalize results by anchoring them around the mean. The methodology using the z-score method can be divided into four steps:

First, we convert all measures as positive indicators, where higher values indicate better outcomes in the aging society.

Second, each positive indicator is standardized using the z-score defined as follows:

$$Zscore = \frac{actual - mean}{standard\ deviation}$$

Third, the domain scores will be calculated as a weighted summation of the measures (in z-scores) using network or equal weights in Table 2.

Lastly, the composite aging index will be a weighted summation of domains z-scores. We converted the final z-scores into a probability ranging between 0 and 100% using the standard normal distribution.

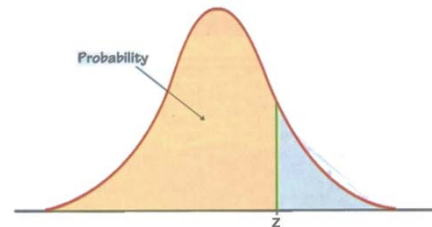

#### 4. Lowest domain method

We also compared the results using the minimum domain score from goalpost method as our index. This weighting scheme will rank high only for countries that have no weakness in their domain scores. This weighting produces a ranking where a low score in one domain cannot be offset by higher scores in other domains. The method was to set the aging index as the minimum over the five domain scores. This weighting scheme will rank high only for countries with no weaknesses in their domain scores. The motivation for this weighting scheme is that while high scores in all five domains imply high quality of life for the elderly, the low score cannot be offset by higher domains.

#### 5. Robustness checks

We utilized three different analytical strategies detailed above (goal post, Z scores and lowest domain) to rank countries within each domain and overall. The composite Aging Society Index has a possible range of 0 to 100. There was a high degree of correlation across the three analytic strategies.

Fig. 2 illustrates the robustness of our composite index scores using different methods such as the widely used goalpost method, standardized Z-score, and the lowest domain. These comparisons resulted in high correlation. The correlation with the lowest domain was the poorest (Pearson correlation  $r_p \geq 0.91$ ) as the lowest



domain had limited information compared to the other methods that pooled the aging index across all domains ( $r_p \geq 0.97$ ).

Fig. 3 and Table 3 compares countries' rankings across weighting schemes and methods for assessing progress. The rankings were highly correlated ( $r_p \geq 0.86$ ), with Norway always coming up top and Hungary last. Using the network weights, both the goalpost and z-score methods ranked Norway, Sweden, U.S., Netherlands and Japan as the top five countries. When equal weights were used, these countries remained at the top except for Japan, being replaced by Denmark. Nevertheless, the Aging Society Index yields consistent results on rankings ( $r > 0.86$ ) using different methods and weighting strategies.

**Fig. 2.** Scatterplot and correlations of scores from different computation methods and weighting strategies in Aging Society Index

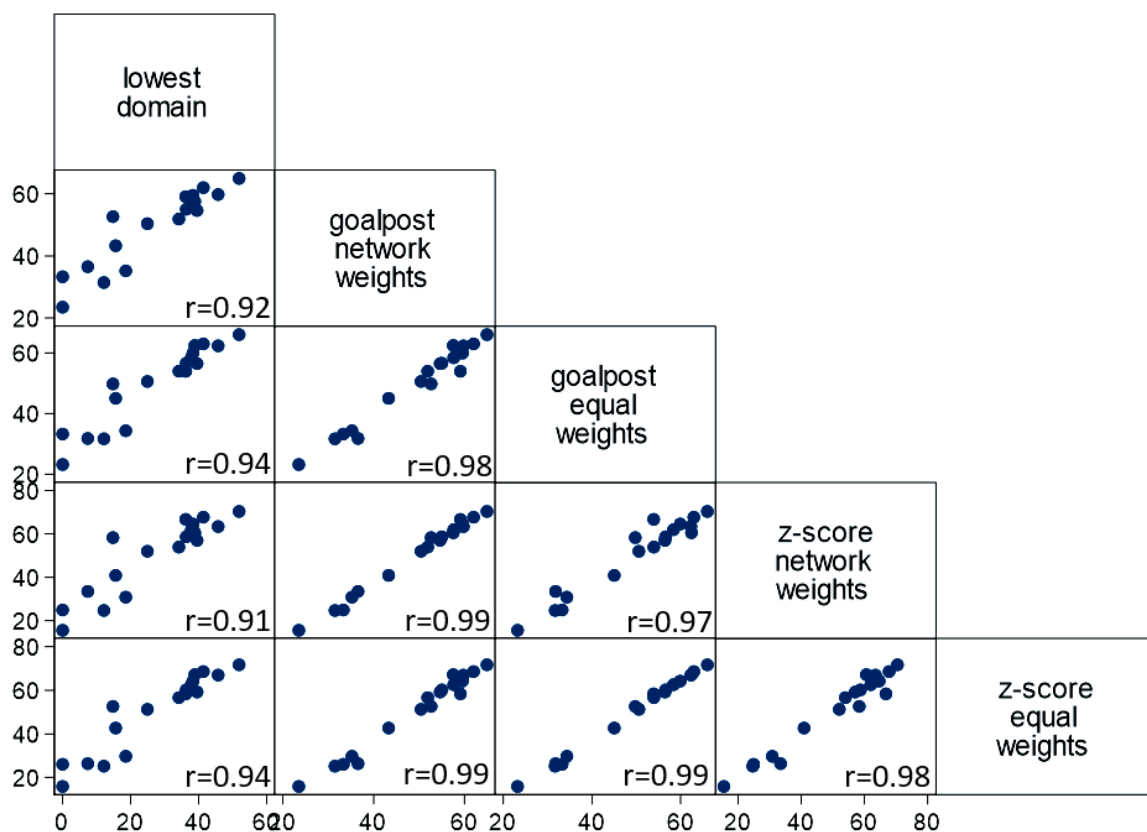

*r*: Pearson correlation coefficient. **Lowest domain**: minimum score over five domain so that a low score in any one domain cannot be offset by higher scores in other domains. **Goalpost**: all individual measures are standardized with a score of 0 for the worst performing country in the data set available and a score of 100 as the best performing countries, where higher values indicate better outcomes in the aging society. **Z-scores** method allows for the standardization of indicators of different types and scales and provided a convenient way to normalize results, by anchoring them around the mean. **Network weights** are the average weights to the measures based on the recommendations of the thirteen member Network. **Equal weights** was to weigh all measures within a domain equally with all weights summing to 100%.

**Fig. 3.** Scatterplot and correlations of rankings from different computation methods and weighting strategies in Aging Society Index

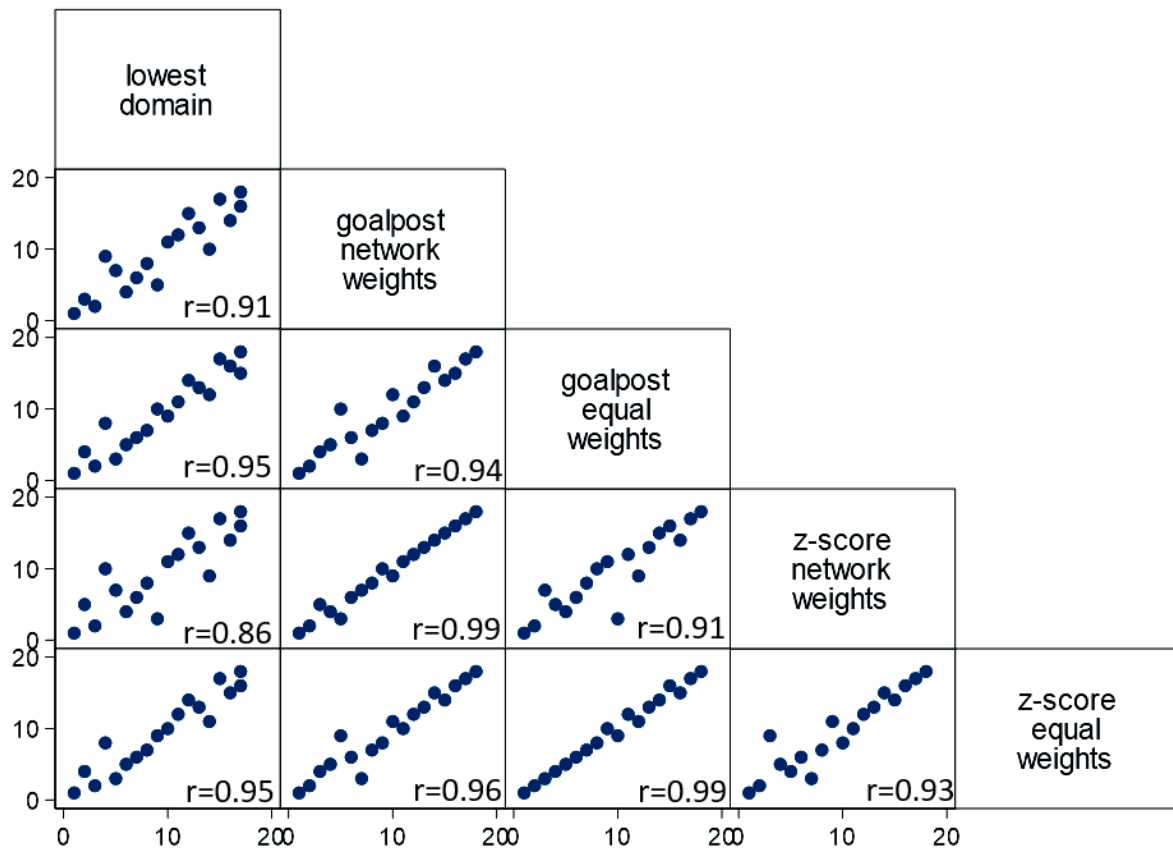

*r*: Pearson correlation coefficient. **Lowest domain**: minimum score over five domain so that a low score in any one domain cannot be offset by higher scores in other domains. **Goalpost**: all individual measures are standardized with a score of 0 for the worst performing country in the data set available and a score of 100 as the best performing countries, where higher values indicate better outcomes in the aging society. **Z-scores** method allows for the standardization of indicators of different types and scales and provided a convenient way to normalize results, by anchoring them around the mean. **Network weights** are the average weights to the measures based on the recommendations of the thirteen member Network. **Equal weights** was to weigh all measures within a domain equally with all weights summing to 100%.

**Table 3.** Countries rankings from different computation methods and weighting strategies

| <b>Country</b> | <b>Lowest domain</b> | <b>Goalpost (network weights)</b> | <b>Goalpost (equal weights)</b> | <b>Z-score (network weights)</b> | <b>Z-score (equal weights)</b> |
|----------------|----------------------|-----------------------------------|---------------------------------|----------------------------------|--------------------------------|
| Austria        | 11                   | 12                                | 11                              | 12                               | 12                             |
| Belgium        | 13                   | 13                                | 13                              | 13                               | 13                             |
| Denmark        | 5                    | 7                                 | 3                               | 7                                | 3                              |
| Estonia        | 17                   | 16                                | 15                              | 16                               | 16                             |
| Finland        | 4                    | 9                                 | 8                               | 10                               | 8                              |
| Germany        | 8                    | 8                                 | 7                               | 8                                | 7                              |
| Hungary        | 17                   | 18                                | 18                              | 18                               | 18                             |
| Ireland        | 7                    | 6                                 | 6                               | 6                                | 6                              |
| Italy          | 16                   | 14                                | 16                              | 14                               | 15                             |
| Japan          | 9                    | 5                                 | 10                              | 3                                | 9                              |
| Netherlands    | 6                    | 4                                 | 5                               | 4                                | 5                              |
| Norway         | 1                    | 1                                 | 1                               | 1                                | 1                              |
| Poland         | 15                   | 17                                | 17                              | 17                               | 17                             |
| Slovenia       | 12                   | 15                                | 14                              | 15                               | 14                             |
| Spain          | 14                   | 10                                | 12                              | 9                                | 11                             |
| Sweden         | 3                    | 2                                 | 2                               | 2                                | 2                              |
| United Kingdom | 10                   | 11                                | 9                               | 11                               | 10                             |
| United States  | 2                    | 3                                 | 4                               | 5                                | 4                              |

We also compared the correlation of measures available for both the young and old. In Fig. 4, we found that the Gini coefficient of the young (age 18 to 65 years) and old (age 65+) were highly correlated, similarly for high school attainment. We acknowledge the failure to capture retirement transition in our index, nevertheless the high correlation of measures between the young and old suggest that our results might be fairly robust.

**Fig. 4.** Comparison of (a) Gini coefficient and (b) Education between the old and young

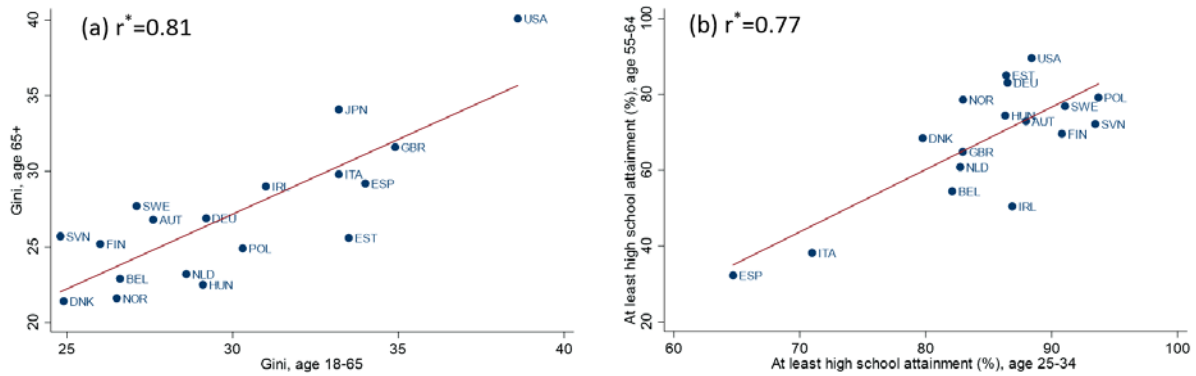

\*  $r$ : correlation coefficient, where each point represent one country

We also compared the Aging Index with other index. The European Active Aging Index (AAI) is a cross-national comparison that is not available for the U.S., thus we compared using only the EU countries (Fig. 5). While there is high correlation of 0.85, we found that Sweden and Estonia are above the regression as they rank high on PRODUCTIVITY AND ENGAGEMENT domain & AAI weigh heavily this measure. Converse is true for countries below the regression (Spain, Austria, Slovenia and Poland), scoring low on AAI due to low PRODUCTIVITY AND ENGAGEMENT.

**Fig. 5.** Scatterplot of European Active Aging Index and Aging Society Index

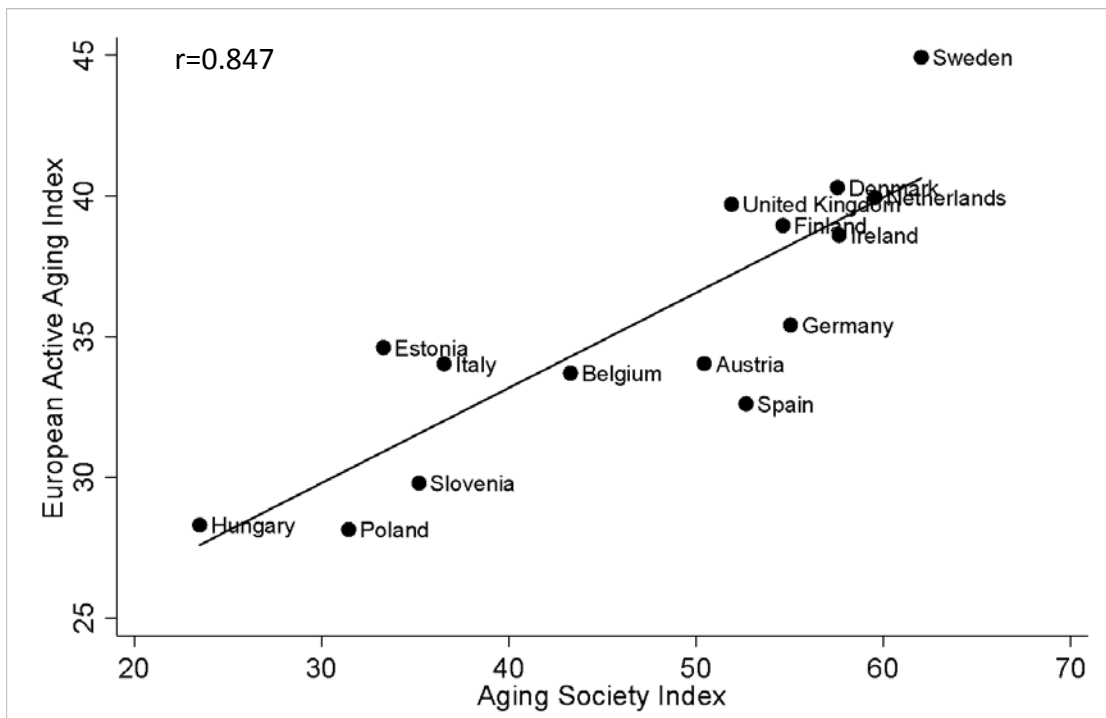

## 6. Programs:

### agingindex.R

```
# This file produces the Aging index scores and rank for 18 OECD countries.
# The input data file : country_data.csv
# Other code files required: calculate.R, goalpost.R, zscore.R

rm(list=ls())
setwd("...")
source("calculate.R")

## Prepare data
data <- read.csv("country_data.csv", header = TRUE, row.names = 1)

Domains <- list()
Names <- c("Productivity", "Wellbeing", "Equity", "Cohesion", "Security")
n <- length(Names)
row <- nrow(data)

for (a in 1:n) Domains[[a]] <- data[,grep(Names[a],colnames(data))]
names(Domains) <- Names

## Set weights

## individual domain constituents

network <- list( Productivity = c(0.35, 0.2555555556, 0.2222222222, 0.1722222222),
  Wellbeing = c(0.70, 0.30),
  Equity = c(0.2959502, 0.1557632, 0.2398754, 0.1401869, 0.1682243),
  Cohesion = c(1, 0, 0, 0, 0, 0),
  Security = c(0, 0.343941140899012, 0.241242088288652,
0.098671638782504, 0.177206208425721, 0, 0.137938923604112) )

equal <- list( Productivity = c(0.25, 0.25, 0.25, 0.25),
  Wellbeing = c(0.50, 0.50),
  Equity = c(0.20, 0.20, 0.20, 0.20, 0.20),
  Cohesion = c(1, 0, 0, 0, 0, 0),
  Security = c(0, 0.20, 0.20, 0.20, 0.20, 0, 0.20) )

## domain weights

dom.network <- c(0.215, 0.245, 0.18, 0.17, 0.19)

dom.equal <- c(0.2, 0.2, 0.2, 0.2, 0.2)

## Calculate index

# calculate.index(X, weight, domain_weight, zscore = FALSE, simple = TRUE, min = FALSE)
# The function calls "goalpost.R" and "zscore.R"
# X :: List of domains
# weight :: List of weights for individual components in a domain;
# length of individual list entry must match column dimension of list entry in X;
# otherwise, an error is returned
# domain_weight :: Vector of weights for each domain
```

```

# zscore :: if TRUE, calculates the z-score instead of using the goalpost method
# simple :: if TRUE, lets "Social support" fully represent "cohesion"
# min :: if TRUE, sets the index to be the minimum of all domain scores

# calculate.index returns a list with
# 1) individual domain scores ( ... $ domain.sum)
# 2) index (... $ index)

# network weighted goalpost
goalpost.network <- calculate.index(Domains, network, dom.network, zscore = FALSE, simple =
TRUE, min = FALSE) $ index

# equal weighted goalpost
goalpost.equal <- calculate.index(Domains, equal, dom.equal, zscore = FALSE, simple = TRUE,
min = FALSE) $ index

# network weighted zscore
zscore.network <- calculate.index(Domains, network, dom.network, zscore = TRUE, simple =
TRUE, min = FALSE) $ index

# equal weighted zscore
zscore.equal <- calculate.index(Domains, equal, dom.equal, zscore = TRUE, simple = TRUE, min
= FALSE) $ index

# lowest domain
goalpost.min <- calculate.index(Domains, network, dom.network, zscore = FALSE, simple =
TRUE, min = TRUE) $ index

## Produce figures and tables

lower.panel <- function(x,y) {
  #par(xaxt = "n", yaxt = "n")
  points(x,y, pch=19, col="navy")
  corr <- round(cor(x,y), digits = 3)
  txt <- paste0("R = ", corr)
  usr <- par("usr"); on.exit(par(usr))
  par(usr = c(0,1,0,1))
  text(0.8, 0.2, txt)
}

## Produce correlogram between for the alternative indices

table <- cbind(goalpost.min,goalpost.network,goalpost.equal,zscore.network,zscore.equal)
colnames(table) <- c("lowest\ndomain", "goalpost\nnetwork\nweights",
  "goalpost\nequal\nweights", "z-score\nnetwork\nweights",
  "z-score\nequal\nweights")
table.p <- table
table.p[,c(4,5)] <- pnorm(table.p[,c(4,5)])*100

pairs(table.p, upper.panel = NULL , lower.panel = lower.panel, cex.labels = 1.2)

## Produce correlogram for the alternative rankings

ranktable <- cbind( round(rank(-goalpost.min, ties.method = "min"),0), rank(-goalpost.network),
  rank(-goalpost.equal), rank(-zscore.network),
  rank(-zscore.equal))

```

```
colnames(ranktable) <- c("lowest\ndomain", "goalpost\nnetwork\nweights",  
  "goalpost\nequal\nweights", "z-score\nnetwork\nweights",  
  "z-score\nequal\nweights")  
  
pairs(ranktable, upper.panel = NULL , lower.panel = lower.panel, cex.labels = 1.2)
```



## calculate.R

```
# Aging Index : calculate index
```

```
calculate.index <- function(X2, weight2, dom.weight, zscore = FALSE, simple = TRUE, min = FALSE)
{
  source("goalpost.R")
  source("zscore.R")

  row <- nrow(X2[[1]][1])
  n <- length(X2)

  if (simple == TRUE) {
    weight2[["Cohesion"]] <- c(1, rep(0,length(weight2$Cohesion)-1))
  } else weight2[["Cohesion"]][1] <- 0.34482759

  domain.sum <- matrix(0, row, n)
  index <- 0

  if (zscore == FALSE) {
    for (b in 1:n) {
      domain.sum[,b] <- Goalpost(X2[[b]],weight2[[b]])
      colnames(domain.sum) <- names(X2)
      index <- domain.sum[,b] * dom.weight[b] + index
    }
  } else {
    for (b in 1:n) {
      domain.sum[,b] <- zscore(X2[[b]],weight2[[b]])
      colnames(domain.sum) <- names(X2)
      index <- domain.sum[,b] * dom.weight[b] + index
    }
  }

  if (min == TRUE) for (d in 1:row) index[d] <- min(domain.sum[d,])

  if (simple == FALSE) {
    row.index <- which(is.na(X2[["Cohesion"]]), arr.ind= TRUE)[,1]
    index[row.index] <- NA
    domain.sum[,"Cohesion"][row.index] <- NA
  }

  row.names(domain.sum) <- row.names(X2[[1]])
  names(index) <- row.names(X2[[1]])
  return(list(domain.sum = domain.sum, index = index))
}
```

## goalpost.R

# Aging Index : Goal post

```
Goalpost <- function(X, weight) {  
  
  m <- ncol(X);  
  
  if (length(weight) != m) {  
    message("Dimensions of weights not equal to number of variables in domain")  
    break  
  }  
  
  mm <- nrow(X)  
  domain.sum <- rep(0, mm)  
  
  for (b in 1:m) {  
    min <- min(na.omit(X[,b])); max <- max(na.omit(X[,b]));  
    X[,b][is.na(X[,b])] <- 0  
    for (c in 1:mm) {  
      domain.sum[c] <- domain.sum[c] + weight[b] * ((X[c,b] - min)/(max - min) * 100)  
    }  
  }  
  
  return(domain.sum)  
}
```

## zscore.R

# Aging Index : Z score

```
zscore <- function(X, weight) {  
  
  m <- ncol(X);  
  
  if (length(weight) != m) {  
    message("Dimensions of weights not equal to number of variables in domain")  
    break  
  }  
  
  mm <- nrow(X)  
  domain.sum <- rep(0, mm)  
  
  for (b in 1:m) {  
    avg <- mean(na.omit(X[,b])); sd <- sd(na.omit(X[,b]));  
    X[,b][is.na(X[,b])] <- 0  
    for (c in 1:mm) {  
      domain.sum[c] <- domain.sum[c] + weight[b] * ((X[c,b] - avg)/sd)  
    }  
  }  
  
  return(domain.sum)  
}
```

## 7. References

1. Rowe JW & Kahn RL (1987) Human aging: usual and successful. *Science* 237(4811):143-149.
2. Kincaide JE, *et al.* (1996) Older adults as a community resource: Results from the national survey of self-care and aging. *Gerontologist* 36(4):474-482.
3. Gonzales E, Matz-Costa C, & Morrow-Howell N (2015) Increasing Opportunities for the Productive Engagement of Older Adults: A Response to Population Aging. *Gerontologist* 55(2):252-261.
4. Jenkinson CE, *et al.* (2013) Is volunteering a public health intervention? A systematic review and meta-analysis of the health and survival of volunteers. *Bmc Public Health* 13.
5. Jung YY, Gruenewald TL, Seeman TE, & Sarkisian CA (2010) Productive Activities and Development of Frailty in Older Adults. *J Gerontol B-Psychol* 65(2):256-261.
6. Morrow-Howell N (2010) Volunteering in Later Life: Research Frontiers. *J Gerontol B-Psychol* 65(4):461-469.
7. Hinterlong JE, Morrow-Howell N, & Rozario PA (2007) Productive engagement and late life physical and mental health - Findings from a nationally representative panel study. *Res Aging* 29(4):348-370.
8. Crimmins EM & Beltran-Sanchez H (2011) Mortality and morbidity trends: is there compression of morbidity? *J Gerontol B Psychol Sci Soc Sci* 66(1):75-86.
9. Prince MJ, *et al.* (2015) The burden of disease in older people and implications for health policy and practice. *Lancet* 385(9967):549-562.
10. Wallace S.P. (2012) Social Determinants of Health Inequities and Healthcare in Old Age. ed T. Prohaska LA, R. Binstock, (Baltimore, MD: The Johns Hopkins University Press., Public Health for an Aging Society).
11. Steven P Wallace (2015) Equity and Social Determinants of Health Among Older Adults. (Journal of the American Society on Aging, American Society on Aging).
12. Emlet CA & Mocerri JT (2012) The importance of social connectedness in building age-friendly communities. *J Aging Res* 2012:173247.
13. Alley D, Liebig P, Pynoos J, Banerjee T, & Choi IH (2007) Creating elder-friendly communities: preparations for an aging society. *J Gerontol Soc Work* 49(1-2):1-18.
14. World Health Organization (2007) Global Age-friendly Cities: A Guide. (World Health Organization Publications).
15. James M. Poterba (2014) Retirement Security in an Aging Society (JEL No. E21,G11,H55,J14).
16. The Research Network on an Aging Society (2017) The John A. Hartford Index of Societal Aging. <http://agingsocietynetwork.org/john-hartford-index-societal-aging>.

## **8. Group Authors: The Network on an Aging Society**

Toni Antonucci

Lisa Berkman

Axel Borsch-Supan

Laura Carstensen

Cynthia Chen

Linda Fried

Frank Furstenberg

Dana Goldman

Martin Kohli

James Jackson

Jay Olshansky

David Rehkopf

John Rother

John Rowe

Julie Zissimopoulos
